# Supplementary material for: The Well-Being of Companion Animal Caregivers and Their Companion Animals during the COVID-19 Pandemic: Scoping Review
Source: MDPI journal article supplement (doi:10.3390/ani13203294), 2023-10-22
Supplement: s1 [file s1]

**Supplementary Table S1.** Characteristics of included studies

| Authors (year)                | Country                  | Study population                                 | Socio-demographic characteristics                                           | Type of pet  | Study design                                     | Human-related aspects assessed                                                                                                                                                                    | Animal-related aspects assessed                                                                                                                                                  | Time period of data collection |
|-------------------------------|--------------------------|--------------------------------------------------|-----------------------------------------------------------------------------|--------------|--------------------------------------------------|---------------------------------------------------------------------------------------------------------------------------------------------------------------------------------------------------|----------------------------------------------------------------------------------------------------------------------------------------------------------------------------------|--------------------------------|
| Adams et al. (2021) [73]      | United States of America | 2,537 adult pet owners                           | 89.1% female<br><br>Mean age 39.3 (range 18 – 85)                           | Not reported | Cross-sectional survey                           | -                                                                                                                                                                                                 | What would happen to pets if owners hospitalized for COVID-19; open-ended question about how presence of pet affected children during COVID-19                                   | April – May 2020               |
| Amiot et al. (2022) [74]      | Canada                   | 2,424: 1,220 pet owners vs. 1,204 non-pet owners | 49.5% male, 50.2% female, 0.3% other<br><br>Approximately 50% were aged 50+ | Various      | Cross-sectional survey                           | Extent of stress as a result of COVID-19; extent of uncertainty as a result of COVID-19; extent of family-related issues as a result of COVID-19; vitality; loneliness; life satisfaction; stress | ‘Do you have one or more pet(s) currently?’; ‘How many pets do you currently have?’; species of pets                                                                             | September – October 2020       |
| Applebaum et al. (2020a) [75] | United States of America | 2,254 pet owners                                 | 89% female<br><br>Mean age 39, range 18-85                                  | Various      | Cross-sectional survey with open-ended responses | -                                                                                                                                                                                                 | Attachment to pets; if and how pets add stress to the COVID-19 situation; difficulties with pets due to social distancing or shelter-in-place; pros and cons of living with pets | April – July 2020              |

|                                  |                                                                                         |                                                                        |                                                                                                                                                                                                       |                   |                                                  |                                                                                    |                                                                                                                                   |                                                     |
|----------------------------------|-----------------------------------------------------------------------------------------|------------------------------------------------------------------------|-------------------------------------------------------------------------------------------------------------------------------------------------------------------------------------------------------|-------------------|--------------------------------------------------|------------------------------------------------------------------------------------|-----------------------------------------------------------------------------------------------------------------------------------|-----------------------------------------------------|
|                                  |                                                                                         |                                                                        |                                                                                                                                                                                                       |                   |                                                  |                                                                                    | during the pandemic                                                                                                               |                                                     |
| Applebaum et al. (2020b) [76]    | United States of America                                                                | 1,356 pet owners                                                       | 89.2% female<br>Mean age 39.0 (range 18-82)                                                                                                                                                           | Not reported      | Cross-sectional survey with open-ended questions | Factors associated with healthcare decision-making                                 | Attachment to pets; would participants delay or avoid COVID-19 testing or treatment because of worries about pet's welfare        | April – May 2020                                    |
| Applebaum et al. (2021) [77]     | United States of America                                                                | 2,068 pet owners                                                       | 89.5% female, 7.8% male, 2.8% other<br>Mean age 39.6                                                                                                                                                  | Not reported      | Cross-sectional survey with open-ended responses | Social support; loneliness                                                         | Attachment to pets; pros and cons of living with pets during the pandemic; advice for people living with pets in future pandemics | April – July 2020                                   |
| Barklam & Felisberti (2023) [78] | Authors in United Kingdom; Study 1 had an international sample, Study 2 had a UK sample | 495 (Study 1 – 344 pet owners vs. 151 non-pet owners)<br>243 (Study 2) | Study 1: Pet owners – 78% female, 22% male; Non-pet owners – 67% female, 33% male<br>Mean age 31.66, range 18-73<br>Study 2: Pet owners – 75% female, 25% male; Non-pet owners – 74% female, 26% male | Dogs, cats, other | Two cross-sectional surveys                      | Loneliness; wellbeing; resilience; optimism; basic psychological need satisfaction | How pandemic affected routines and interactions with pets, and ability to care for pet; pet attachment                            | Study 1: May - June 2020<br>Study 2: September 2021 |

|                                 |                   |                                                                         |                                                                                                                      |                                 |                                                               |                                                                                                                                            |                                                                                                                |                        |
|---------------------------------|-------------------|-------------------------------------------------------------------------|----------------------------------------------------------------------------------------------------------------------|---------------------------------|---------------------------------------------------------------|--------------------------------------------------------------------------------------------------------------------------------------------|----------------------------------------------------------------------------------------------------------------|------------------------|
|                                 |                   |                                                                         | Mean age 27.7,<br>range 18-38                                                                                        |                                 |                                                               |                                                                                                                                            |                                                                                                                |                        |
| Bennett et al.<br>(2022) [79]   | Australia         | 250 adults<br>with<br>companion<br>animals                              | 212 females, 34<br>males, 4 non-<br>binary                                                                           | Various                         | Cross-<br>sectional<br>survey with<br>open-ended<br>questions | Satisfaction with<br>life; mental<br>wellbeing                                                                                             | Pet dependency;<br>perceived<br>emotional<br>support from<br>pets; pets' effect<br>on emotional<br>experiences | June – August<br>2020  |
| Bennetts et al.<br>(2022a) [80] | Australia         | 1,034 parents<br>living with a<br>child under 18<br>and a cat or<br>dog | 77.7% female,<br>21.8% male,<br>0.1% non-<br>binary, 0.5%<br>prefer not to<br>say<br><br>Mean age 43,<br>range 20-65 | Cats, dogs                      | Cross-<br>sectional<br>survey                                 | 107 closed-end<br>questions and 2<br>open-ended items<br>including parent<br>and child<br>wellbeing, child<br>anxiety, COVID-<br>19 impact | Human-pet<br>attachment                                                                                        | July - October<br>2020 |
| Bennetts et al.<br>(2022b) [81] | Australia         | 611 parents<br>with a child<br>under 18 and a<br>cat or dog             | 80.7% female,<br>18.6% male,<br>0.2% non-<br>binary, 0.5%<br>prefer not to<br>say<br><br>Mean age 43.0               | Cats, dogs                      | Open-ended<br>questions on a<br>cross-sectional<br>survey     | -                                                                                                                                          | Challenges and<br>benefits of having<br>a cat or dog<br>during pandemic                                        | July – October<br>2020 |
| Bennetts et al.<br>(2023) [82]  | Australia         | 1,034 parents<br>living with a<br>child under 18<br>and a cat or<br>dog | 78% female<br><br>Mean age 43,<br>range 20-65                                                                        | Cats, dogs                      | Cross-<br>sectional<br>survey                                 | Parent and child<br>psychological<br>wellbeing                                                                                             | Benefits of having<br>a pet; worries<br>relating to the pet;<br>engagement in<br>pet-related<br>activities     | July – October<br>2020 |
| Blue Cross<br>(n.d.) [83]       | United<br>Kingdom | 2,946 pet<br>owners                                                     | Not reported                                                                                                         | Dogs, cats,<br>small<br>animals | Cross-<br>sectional<br>survey                                 | -                                                                                                                                          | Pet-related<br>experiences<br>during the<br>pandemic                                                           | May – June<br>2020     |

|                                  |                          |                       |                                               |                   |                                                  |                                |                                                                                                                                                                                                                                                                                                                                                                                                                                                  |                              |
|----------------------------------|--------------------------|-----------------------|-----------------------------------------------|-------------------|--------------------------------------------------|--------------------------------|--------------------------------------------------------------------------------------------------------------------------------------------------------------------------------------------------------------------------------------------------------------------------------------------------------------------------------------------------------------------------------------------------------------------------------------------------|------------------------------|
| Boardman & Farnworth (2022) [84] | United Kingdom (England) | 15 dog owners         | 9 females, 6 males<br><br>Age not reported    | Dogs              | Qualitative interviews                           | Work situation during COVID-19 | Dogs' social behavior during and after lockdown                                                                                                                                                                                                                                                                                                                                                                                                  | December 2021 – January 2022 |
| Bohn et al. (2021) [85]          | Brazil                   | 1,123 older adults    | 90.7% female<br><br>Mean age 67.68            | Dogs, cats, birds | Cross-sectional survey                           | Depression                     | Pet ownership – yes/no; type of pet                                                                                                                                                                                                                                                                                                                                                                                                              | June 2020                    |
| Bolstad et al. (2021) [86]       | United States of America | 102 dog or cat owners | 91.2% female<br><br>Mean age 38 (range 21-84) | Dogs, cats        | Cross-sectional survey with open-ended questions | -                              | If a new pet was acquired during pandemic; engagement with pet during the pandemic and in the month prior (time spent with pet, responsibilities, time spent physically touching pets, pleasantness of engaging with pet, upset feelings toward pets, attachment to pets); how COVID-19 experience was affected by being a pet owner; if pet was helpful or unhelpful in coping with social distancing; concerns relating to pet during pandemic | April – May 2020             |

|                             |                |                                                         |                                              |            |                                |                                                                                                                                                                                |                                                                                                                                                                                                                                                                                                                       |                                                                                                                                                                                              |
|-----------------------------|----------------|---------------------------------------------------------|----------------------------------------------|------------|--------------------------------|--------------------------------------------------------------------------------------------------------------------------------------------------------------------------------|-----------------------------------------------------------------------------------------------------------------------------------------------------------------------------------------------------------------------------------------------------------------------------------------------------------------------|----------------------------------------------------------------------------------------------------------------------------------------------------------------------------------------------|
| Bowen et al.<br>(2020) [87] | Spain          | 1,297 adult pet owners (794 dog owners, 503 cat owners) | 90.5% female<br><br>Mean age not reported    | Cats, dogs | Cross-sectional survey         | Socio-demographics; type of home; effect of confinement; number of weeks confined; negative financial, emotional, health and lifestyle effects of confinement; quality of life | Number of pet cats and dogs; cat/dog-owner relationship scale to assess human-animal bond on three dimensions (interaction, emotional closeness, perceived costs); effect of confinement on pet's quality of life; anger towards pet; changes in pet's behavior; confinement concerns; pre-confinement outdoor access | Not reported, but participants had been in confinement for an average of 3.2 weeks at the point of data collection (lockdown was imposed in March 2020) and the paper was submitted May 2020 |
| Bowen et al.<br>(2021) [88] | Spain          | 794 dog owners                                          | 90.2% female, 9.8% male<br><br>Mean age 40.7 | Dogs       | Comparative surveys            | -                                                                                                                                                                              | Cat/dog owner relationship                                                                                                                                                                                                                                                                                            | Representative sample data collected early 2019; convenience sample provided data 'two weeks after the start of Spanish lockdown'                                                            |
| Brand et al.<br>(2022) [89] | United Kingdom | 4,369 'pandemic puppies' purchased between              | Pandemic puppies: owners 90% female          | Dogs       | Comparison study using surveys | -                                                                                                                                                                              | Attending puppy classes; puppy health issues; veterinary care                                                                                                                                                                                                                                                         | November – December 2020                                                                                                                                                                     |

|                              |                                                                                                  |                                                                      |                                                                                                                                         |              |                        |                                                                                                    |                                                                                                                                                                             |                    |
|------------------------------|--------------------------------------------------------------------------------------------------|----------------------------------------------------------------------|-----------------------------------------------------------------------------------------------------------------------------------------|--------------|------------------------|----------------------------------------------------------------------------------------------------|-----------------------------------------------------------------------------------------------------------------------------------------------------------------------------|--------------------|
|                              |                                                                                                  | March – December 2020 vs. 1,148 ‘2019 puppies’ purchased during 2019 | Age group most represented was 25-54 (48.7%)<br><br>2019 puppies: owners 92% female<br><br>Age group most represented was 25-54 (48.6%) |              |                        |                                                                                                    |                                                                                                                                                                             |                    |
| Bussolari et al. (2021) [90] | Authors in USA; participants global (80.7% USA, 8.7% Canada, 4.3% UK, 1.6% Australia, 4.7% other | 4,105 adults with companion dogs                                     | 88.3% female, 10.8% male, 0.8% non-binary, 0.4% no answer<br><br>Mean age 48.06 (range 18-92)                                           | Dogs         | Cross-sectional survey | Levels of social restriction; access to social support; coping                                     | Human-animal bond; pandemic-related changes in relationships with dogs; stressors; ways in which COVID-19 impacted feelings about dogs; access to dog food and medical care | March - April 2020 |
| Caldwell et al. (2021) [91]  | Canada                                                                                           | 699 parents of children/youth and 279 youth                          | Parents: 53% female<br>Age not reported<br><br>Youth: 68.5% cisgender female, 26.2% cisgender male, 1.4% transgender male, 0.4%         | Not reported | Cross-sectional survey | Health behaviors (physical activity, sleep, screen time); thoughts and feelings about the pandemic | -                                                                                                                                                                           | August 2020        |

|                           |                                                            |                                                                         |                                                                                            |      |                        |                                                                                                                                                                          |                                                                                    |                                 |
|---------------------------|------------------------------------------------------------|-------------------------------------------------------------------------|--------------------------------------------------------------------------------------------|------|------------------------|--------------------------------------------------------------------------------------------------------------------------------------------------------------------------|------------------------------------------------------------------------------------|---------------------------------|
|                           |                                                            |                                                                         | transgender female, 1.1% non-binary, 0.7% two-spirited, 0.4% other, 1.4% prefer not to say |      |                        |                                                                                                                                                                          |                                                                                    |                                 |
|                           |                                                            |                                                                         | Age group most represented was Grade 10-12 (68.5%)                                         |      |                        |                                                                                                                                                                          |                                                                                    |                                 |
| Caney et al. (2022a) [92] | Authors in United Kingdom; participants were international | 371 veterinary consultations (210 standard vs. 161 during COVID-19)     | Not reported                                                                               | Cats | Cross-sectional survey | -                                                                                                                                                                        | Experiences of veterinary appointments; cat behavior and stress during appointment | March – July 2020               |
| Caney et al. (2022b) [93] | Authors in United Kingdom; participants were international | 242 veterinary professionals, 98 owners with experience of telemedicine | Not reported                                                                               | Cats | Cross-sectional survey | -                                                                                                                                                                        | Perceived advantages and disadvantages of telemedicine for animals                 | September – December 2020       |
| Carr et al. (2021) [94]   | United States of America                                   | 466 older adults                                                        | 66% female<br>Mean age 69.4, range 60-92                                                   | Dogs | Longitudinal           | Loneliness (controlled for other pet ownership, health and financial impact of pandemic, impact of other stressful societal events, socio-demographics, social support); | Frequency of dog-walking                                                           | September 2018 and October 2020 |

|                                      |                             |                                                                                                                                                                |                                                                                                                                                                                                                                                                                                                                     |         |                               | social impact of<br>COVID-19                                                                          |                                                                                                                                                                                                                                                                                                                                                                                                                                                                                |                                                                                                                        |
|--------------------------------------|-----------------------------|----------------------------------------------------------------------------------------------------------------------------------------------------------------|-------------------------------------------------------------------------------------------------------------------------------------------------------------------------------------------------------------------------------------------------------------------------------------------------------------------------------------|---------|-------------------------------|-------------------------------------------------------------------------------------------------------|--------------------------------------------------------------------------------------------------------------------------------------------------------------------------------------------------------------------------------------------------------------------------------------------------------------------------------------------------------------------------------------------------------------------------------------------------------------------------------|------------------------------------------------------------------------------------------------------------------------|
| Charmaraman<br>et al. (2022)<br>[95] | United States<br>of America | Survey: 567<br>pet-owning<br>adolescents<br>and subset of<br>356 dog<br>owning<br>adolescents<br>aged 10-17<br><br>Interviews: 31<br>parents of<br>adolescents | Pet owning<br>adolescents:<br>55% female,<br>44% male, 1%<br>non-binary or<br>missing gender<br><br>Mean age 13.09,<br>range 10-17<br><br>Dog owning<br>adolescents:<br>55% female,<br>45% male<br><br>Mean age 13.24,<br>range 10-17<br><br>Parents: 28/31<br>female, 2/31<br>male, 1/31 non-<br>binary<br><br>Age not<br>reported | Various | Mixed-<br>methods             | Surveys: Coping<br>strategies; family<br>relationships<br>during COVID-<br>19; socio-<br>demographics | Pet ownership –<br>yes/no; dog<br>ownership –<br>yes/no; pet<br>caretaking<br>responsibility; top<br>5 identities (e.g.<br>friend, athlete,<br>student, pet<br>owner)<br><br>Interviews: how,<br>when and why<br>they acquired<br>pets; coping and<br>stress<br>management;<br>caretaking<br>responsibilities;<br>social media and<br>digital technology<br>as it relates to the<br>pet; child<br>emotional<br>attachment to the<br>pet; impact of<br>COVID on having<br>a pet | Fall 2020                                                                                                              |
| Christley et al.<br>(2021) [96]      | United<br>Kingdom           | 6,004 dog<br>owners                                                                                                                                            | 85.7% female,<br>14.2% male,<br>0.1% self-<br>identified<br><br>Age not<br>reported                                                                                                                                                                                                                                                 | Dogs    | Cross-<br>sectional<br>survey | -                                                                                                     | Dog behavior;<br>management and<br>environment of<br>the dog; dog-<br>walking practices;<br>interactions with<br>people and other                                                                                                                                                                                                                                                                                                                                              | Data collected<br>May 2020;<br>participants<br>provided data<br>for the 7 days<br>prior to survey<br>completion<br>and |



|                                     |                                                 |                                                                                   |                                                                                                                                                                                                              |                                                               |                             |                                                                                                                                                                                |                                                                                                                                                                                                                                                                                                                                                                                                                               |                                                                                           |
|-------------------------------------|-------------------------------------------------|-----------------------------------------------------------------------------------|--------------------------------------------------------------------------------------------------------------------------------------------------------------------------------------------------------------|---------------------------------------------------------------|-----------------------------|--------------------------------------------------------------------------------------------------------------------------------------------------------------------------------|-------------------------------------------------------------------------------------------------------------------------------------------------------------------------------------------------------------------------------------------------------------------------------------------------------------------------------------------------------------------------------------------------------------------------------|-------------------------------------------------------------------------------------------|
|                                     |                                                 |                                                                                   |                                                                                                                                                                                                              |                                                               |                             |                                                                                                                                                                                | dogs; enrichment activities                                                                                                                                                                                                                                                                                                                                                                                                   | retrospective data for February 2020                                                      |
| Clements et al. (2021) [97]         | Authors in United Kingdom; international sample | 1,199 adults (quantitative survey), 757 open-ended survey responses 25 interviews | Quantitative survey: 82% female, 17% male, 1% other, 1% prefer not to say<br><br>Age group most represented was 18-34 (38%)<br><br>Qualitative: 88% female<br><br>Age group most represented was 18-34 (40%) | Dogs, cats, fish, small mammals, exotic animals, birds, other | Mixed-methods               | Survey: socio-demographics; social and lifestyle behaviors during pandemic; loneliness; mental wellbeing; depression, anxiety and stress; changes in wellbeing during pandemic | Survey: Which type of companion animals; where animal lived/slept; if they were the primary caregiver; interaction affected by pandemic?; influence of animal on wellbeing; level of engagement; accessing veterinary treatment; other pandemic issues regarding animal care; level of concern about contracting/giving COVID from/to animals<br><br>Interviews: Experiences of having a companion animal during the pandemic | Quantitative data: June - November 2020<br><br>Qualitative data: June 2020 - January 2021 |
| Currin-McCulloch et al. (2021) [98] | Authors in United States of America;            | 956 cat owners                                                                    | 91.5% female, 7.7% male, 0.3% non-                                                                                                                                                                           | Cats                                                          | Cross-sectional qualitative | -                                                                                                                                                                              | Whether increased time with cat                                                                                                                                                                                                                                                                                                                                                                                               | March 2020 – May 2020                                                                     |

|                                  |                                                                                                                          |                  |                                                                                     |         |                                  |                                                      |                                                                                                                                                                                                                                                                      |              |
|----------------------------------|--------------------------------------------------------------------------------------------------------------------------|------------------|-------------------------------------------------------------------------------------|---------|----------------------------------|------------------------------------------------------|----------------------------------------------------------------------------------------------------------------------------------------------------------------------------------------------------------------------------------------------------------------------|--------------|
|                                  | participants from United States of America (95.7%), Canada (0.4%), United Kingdom (0.8%), Australia (0.2%), other (2.8%) |                  | binary, 0.4% prefer not to answer<br><br>Age group most represented was 50-59 (27%) |         | survey with open-ended questions |                                                      | strengthened or strained the relationship; perceived impact of cat on stress; any other thoughts about living with a cat during the pandemic                                                                                                                         |              |
| D'Angelo et al. (2021) [99]      | Italy                                                                                                                    | 2,028 dog owners | 81.39% female, 18.61% male<br><br>Age group most represented was 30-40 (24.7%)      | Dogs    | Cross-sectional survey           | -                                                    | Information relating to dog and its management, including provenance and behavioral problems; dog-owner relationship scale; dog's lifestyle during lockdown; clinical and behavioral symptoms in dogs; owner perception of distress and emotional discomfort in dogs | May 2020     |
| Damberg & Frömbling (2022) [100] | United States of America                                                                                                 | 215 pet owners   | 63.3% male, 36.7% female                                                            | Various | Cross-sectional survey           | Psychological distress; subjective wellbeing; social | Giving and needing of animal support                                                                                                                                                                                                                                 | October 2020 |

|                                                                  |                |              | Age group most represented was 18-35 (60.5%)           |         |                        | isolation during COVID                                                                                                                                                                                                                                                                                                                                                       |                                                                                                       |                  |
|------------------------------------------------------------------|----------------|--------------|--------------------------------------------------------|---------|------------------------|------------------------------------------------------------------------------------------------------------------------------------------------------------------------------------------------------------------------------------------------------------------------------------------------------------------------------------------------------------------------------|-------------------------------------------------------------------------------------------------------|------------------|
| Denis-Robichaud et al. (2022) [101]                              | Canada         | 1,500 adults | 50.2% female, 49.5% male, 0.3% other or did not answer | Various | Cross-sectional survey | Quality of life (including mobility, self-care, usual activities, pain and discomfort, anxiety and depression); loneliness; mental health; wellbeing before and during pandemic<br>Potential confounders – demographics; physical and mental health, current social support, attitude toward companion animals and recent changes in ownership, employment status and change | Presence of at least one companion animal in the household – yes/no                                   | April - May 2021 |
| Dogs Trust (2020) [same dataset as Christley et al., 2020] [102] | United Kingdom | 6,004 dogs   | Not reported                                           | Dogs    | Cross-sectional survey | -                                                                                                                                                                                                                                                                                                                                                                            | Dogs' behavior /management during last seven days (lockdown) and during February 2020 (pre-lockdown); | May 2020         |

|                              |                          |                                          |                                                 |                   |                                                                                               |                                                                                                                                             |                                                                                       |                                                                          |
|------------------------------|--------------------------|------------------------------------------|-------------------------------------------------|-------------------|-----------------------------------------------------------------------------------------------|---------------------------------------------------------------------------------------------------------------------------------------------|---------------------------------------------------------------------------------------|--------------------------------------------------------------------------|
|                              |                          |                                          |                                                 |                   |                                                                                               |                                                                                                                                             | owners' bond with dogs; positive and negative aspects of having a dog during lockdown |                                                                          |
| Dominick (2022) [103]        | United States of America | 201 adults                               | 77.6% female<br>Mean age 35.39<br>(range 18-81) | Not reported      | Longitudinal                                                                                  | Human social support; post-traumatic growth; coping strategies; stressful events; how COVID-19 challenged core beliefs                      | Pet ownership – yes/no; if yes – social support provided by pets                      | T1: March 2020<br>T2: April 2020<br>T3: September 2020<br>T4: March 2021 |
| Dominick et al. (2022) [104] | United States of America | 420 adults                               | 80% female<br>Mean age 32.51                    | Not reported      | Longitudinal                                                                                  | Human social support; social media use for coping during isolation; post-traumatic growth; degree to which COVID-19 challenged core beliefs | Pet ownership – yes/no; if yes – social support provided by pets                      | T1: March – April 2020<br>T2: April – May 2020                           |
| Dost et al. (2022) [105]     | Germany                  | 491 homeless individuals                 | 82.3% male<br>Mean age 43.4<br>(range 18-80)    | Various           | Cross-sectional survey                                                                        | Loneliness                                                                                                                                  | Pet ownership – yes/no                                                                | July - September 2021                                                    |
| Esam et al. (2021) [106]     | New Zealand              | T1: 686 pet owners<br>T2: 498 pet owners | Age, gender not reported                        | Dogs, cats, other | Two cross-sectional surveys at different time-points (unknown whether any of the same people) | -                                                                                                                                           | Perceived benefits and negative effects of the pandemic on pets                       | T1: April 2020<br>T2: July 2020                                          |

|                                         |             |                                                                        |                                                                                                           |              | completed<br>both)            |                                                                                                                                                                                                                      |                                                                                           |                                                                                                                                 |
|-----------------------------------------|-------------|------------------------------------------------------------------------|-----------------------------------------------------------------------------------------------------------|--------------|-------------------------------|----------------------------------------------------------------------------------------------------------------------------------------------------------------------------------------------------------------------|-------------------------------------------------------------------------------------------|---------------------------------------------------------------------------------------------------------------------------------|
| Falck et al.<br>(2022) [107]            | Canada      | 12,068 adults<br>(4,718 pet<br>owners vs.<br>7,350 non-<br>owners)     | 48.9% male<br><br>Mean age 65.01<br>(range 45-86 at<br>study entry)                                       | Not reported | Longitudinal                  | Diagnosis of<br>mental health<br>disorder;<br>depression;<br>anxiety                                                                                                                                                 | Pet ownership –<br>yes/no                                                                 | Participants<br>had completed<br>surveys in<br>2015-2018, then<br>again April -<br>May 2020 and<br>September -<br>December 2020 |
| Flores-Flores<br>et al. (2023)<br>[108] | Peru        | 40 older adults                                                        | 60% female,<br>40% male<br><br>Mean age 72.1                                                              | Various      | Qualitative<br>interviews     | Feelings,<br>thoughts and<br>behaviors relating<br>to economic<br>circumstances,<br>employment,<br>interactions,<br>social support,<br>coping activities<br>and adaptations                                          | -                                                                                         | August -<br>December 2020                                                                                                       |
| Gasteiger et<br>al. (2021) [109]        | New Zealand | 681 adults                                                             | 89.3% female,<br>10% male, 0.6%<br>other, 0.1%<br>prefer not to<br>say<br><br>Mean age 42,<br>range 18-87 | Various      | Cross-<br>sectional<br>survey | Depression;<br>anxiety; stress;<br>positive mood;<br>worry about<br>contracting<br>COVID;<br>loneliness;<br>perceived risk of<br>catching COVID;<br>engagement in<br>smoking, exercise<br>and alcohol<br>consumption | Pet ownership –<br>yes/no                                                                 | May - June<br>2020                                                                                                              |
| Giansanti et<br>al. (2022) [110]        | Italy       | 781 elderly<br>individuals<br>(405 pet<br>owners, 376<br>without pets) | 50.7% male,<br>49.3% female                                                                               | Dogs, cats   | Cross-<br>sectional<br>survey | Anxiety                                                                                                                                                                                                              | Pet ownership<br>(yes/no); number<br>of pets owned; if<br>pet lives in the<br>house; most | Not reported;<br>described to be<br>'immediately<br>at the                                                                      |

|                                        |                                                       |                                                                                                                                                                                    |                                             |                             |                                                                   |                                                                                                                                        |                                                                                                                                                                                                                                                                  |                               |
|----------------------------------------|-------------------------------------------------------|------------------------------------------------------------------------------------------------------------------------------------------------------------------------------------|---------------------------------------------|-----------------------------|-------------------------------------------------------------------|----------------------------------------------------------------------------------------------------------------------------------------|------------------------------------------------------------------------------------------------------------------------------------------------------------------------------------------------------------------------------------------------------------------|-------------------------------|
|                                        |                                                       |                                                                                                                                                                                    | Mean age 71.7<br>(males), 71.4<br>(females) |                             |                                                                   |                                                                                                                                        | relaxing aspects<br>of having a pet;<br>sensations<br>associated with<br>pet                                                                                                                                                                                     | beginning of<br>restrictions' |
| Gijón Puerta<br>et al. (2022)<br>[111] | Spain, Costa<br>Rica                                  | 942 university<br>students                                                                                                                                                         | 82.6% female,<br>17.4% male                 | Not reported                | Cross-<br>sectional<br>survey                                     | Anxiety; stress;<br>depression                                                                                                         | Pet ownership –<br>yes/no                                                                                                                                                                                                                                        | May 2020                      |
|                                        |                                                       |                                                                                                                                                                                    | Mean age 23.8,<br>range 18-58               |                             |                                                                   |                                                                                                                                        |                                                                                                                                                                                                                                                                  |                               |
| Grajfoner et<br>al. (2021) [112]       | Malaysia                                              | 448 adults                                                                                                                                                                         | 58.5% female,<br>41.5% male                 | Dogs, cats,<br>birds, other | Cross-<br>sectional<br>survey                                     | Mental wellbeing;<br>depression,<br>anxiety and<br>stress; resilience;<br>coping self-<br>efficacy; positive<br>and negative<br>affect | Pet ownership<br>(yes/no); type of<br>companionship<br>(pets only, pets<br>and humans,<br>humans only,<br>none); type of pet                                                                                                                                     | June - July<br>2020           |
|                                        |                                                       |                                                                                                                                                                                    | Mean age 34.75,<br>range 18-70              |                             |                                                                   |                                                                                                                                        |                                                                                                                                                                                                                                                                  |                               |
| Gregory<br>(2023) [113]                | United<br>Kingdom                                     | 17 (dog<br>owners who<br>purchased<br>dogs during<br>the pandemic<br>and<br>professionals<br>such as<br>veterinarians,<br>animal welfare<br>organization<br>staff and<br>breeders) | Not reported                                | Dogs                        | Interviews,<br>document<br>analysis,<br>observational<br>research | -                                                                                                                                      | Interviews<br>assessed how the<br>pandemic<br>impacted the<br>welfare of dogs;<br>document<br>analysis<br>examined how<br>social distancing<br>protocols affected<br>dogs;<br>observations of<br>dog breeders'<br>breeding, raising<br>and selling<br>conditions | Not reported                  |
| Hart et al.<br>(2022) [114]            | Authors in<br>United States<br>of America;<br>unclear | 147 AIDS<br>survivors                                                                                                                                                              | 79.6% male,<br>20.4% female                 | Cats, dogs                  | Cross-<br>sectional<br>survey (also<br>retrospectively            | Sources of<br>support;<br>experiences with<br>stigma, aloneness,                                                                       | Owning a cat or<br>dog during the<br>AIDS pandemic<br>and/or the                                                                                                                                                                                                 | May - July<br>2021            |

|                                                     | where participants were based                                                                                      |                                                             | Age group most represented was 61-70 (38.1%)                                                                                      |              | assessing experiences of the AIDS pandemic 1981-1997) | isolation, sadness/grief and social support during the early AIDS pandemic and the COVID-19 pandemic                                | COVID-19 pandemic; positive and negative consequences associated with having a pet; support provided in caring for the pet                                                      |                                                                                                           |
|-----------------------------------------------------|--------------------------------------------------------------------------------------------------------------------|-------------------------------------------------------------|-----------------------------------------------------------------------------------------------------------------------------------|--------------|-------------------------------------------------------|-------------------------------------------------------------------------------------------------------------------------------------|---------------------------------------------------------------------------------------------------------------------------------------------------------------------------------|-----------------------------------------------------------------------------------------------------------|
| Harvey et al. (2022) [115]                          | United Kingdom                                                                                                     | 1,807 dogs                                                  | Not reported                                                                                                                      | Dogs         | Follow-up study                                       | -                                                                                                                                   | Time dog was left alone without company; separation-related behaviors                                                                                                           | February 2020 (data collected retrospectively in May – July 2020), October 2020                           |
| Hawkins & Brodie (2020) [conference abstract] [116] | Not reported                                                                                                       | 86 individuals                                              | Not reported                                                                                                                      | Not reported | Follow-up study                                       | Psychological wellbeing; depression; anxiety; stress; negative affect                                                               | Pet ownership – yes/no                                                                                                                                                          | Dates not reported; participants completed surveys at three time points, two weeks apart, during lockdown |
| Hawkins et al. (2022a) [117]                        | Authors in the United Kingdom; participants in United Kingdom, United States of America, Canada, Brazil, Australia | 117 caregivers reporting on children, 77 child self-reports | Caregivers: 91 mothers, 17 fathers, 7 other<br>Age not reported<br><br>Children: 57% female, 43% male<br>Mean age 10 (range 7-13) | Dogs         | Cross-sectional survey                                | Caregiver-reported child behavior toward dog; caregiver-reported child psychopathology; caregiver-reported child emotion regulation | Number of dogs in the house; age, sex and breed of dog; place of dog acquisition; whether child helped choose dog; whether child considered dog to be their own; child-reported | January – August 2021                                                                                     |

|                              |                          |                                  |                                                                            |              |                        |                                                                                                                    |                                                                                                                                                                                                                                                                                                    |                    |
|------------------------------|--------------------------|----------------------------------|----------------------------------------------------------------------------|--------------|------------------------|--------------------------------------------------------------------------------------------------------------------|----------------------------------------------------------------------------------------------------------------------------------------------------------------------------------------------------------------------------------------------------------------------------------------------------|--------------------|
|                              |                          |                                  |                                                                            |              |                        |                                                                                                                    | attachment to dogs                                                                                                                                                                                                                                                                                 |                    |
| Hawkins et al. (2022b) [118] | United Kingdom           | 11 domestic abuse helpline staff | 91% female, 9% male<br><br>Mean age 39.6 (range 24-56)                     | Not reported | Qualitative interviews | -                                                                                                                  | Nature and frequency of helpline calls relating to companion animals within the home                                                                                                                                                                                                               | January – May 2021 |
| Hoffman (2021) [119]         | United States of America | 454 teleworkers                  | 231 females<br><br>Mean age 41.3, range 19-72                              | Dogs, cats   | Cross-sectional survey | Experiences of working from home, including interference of work and personal life; positive and negative emotions | Household included dog or cat – yes/no; how likely they were to pet their cat or dog for 5+ consecutive minutes, play with their cat or dog, and walk their dog on days working from home and days in the office; how having a pet factored into experience of working from home and in the office | June 2020          |
| Hoffman et al. (2021) [120]  | United States of America | 10,044 adults                    | 46.7% male, 53.3% female<br><br>Age group most represented was 55+ (37.8%) | Dogs, cats   | Cross-sectional survey | COVID-related worries                                                                                              | Ownership of cats or dogs – yes/no; whether participants planned to rehome an animal in the next 3 months; whether they had acquired                                                                                                                                                               | May – June 2021    |



|                             |                |                                                                                                   |                                                                                                                                                                                                                                                                                                                |      |                                                     |   |                                                                                                                                                                                                                                                |                                                 |
|-----------------------------|----------------|---------------------------------------------------------------------------------------------------|----------------------------------------------------------------------------------------------------------------------------------------------------------------------------------------------------------------------------------------------------------------------------------------------------------------|------|-----------------------------------------------------|---|------------------------------------------------------------------------------------------------------------------------------------------------------------------------------------------------------------------------------------------------|-------------------------------------------------|
|                             |                |                                                                                                   |                                                                                                                                                                                                                                                                                                                |      |                                                     |   | or fostered animals during pandemic; whether they had relinquished an animal and reasons for relinquishing animal; animal-related worries                                                                                                      |                                                 |
| Holland et al. (2021) [121] | United Kingdom | Survey: 5,063 dog owners<br><br>Diary: 64 general public, 262 Generation Pup project participants | Survey: 86% female, 14% male, less than 1% preferred not to say or identified as 'other'<br><br>Age group most represented was 55-64 (25.2%)<br><br>Diary: 57% female; 6 male; 1 did not disclose<br><br>Age group most represented was 55-64 (31.3% of general public respondents and 29.4% of Generation Pup | Dogs | Open-ended survey questions and an electronic diary | - | Survey: What they were enjoying about dog ownership at the current time; what they were concerned about regarding their dog(s) at the current time<br><br>Diary: how dog's life and their relationship with their dog was impacted by lockdown | Survey: May 2020<br><br>Diary: March - May 2020 |

|                                      |                                                                                                                         |                                                           |                                                                                                                                                                                                                                           |              |                               |   |                                                                                                                                                        |                    |
|--------------------------------------|-------------------------------------------------------------------------------------------------------------------------|-----------------------------------------------------------|-------------------------------------------------------------------------------------------------------------------------------------------------------------------------------------------------------------------------------------------|--------------|-------------------------------|---|--------------------------------------------------------------------------------------------------------------------------------------------------------|--------------------|
|                                      |                                                                                                                         |                                                           | project<br>respondents)                                                                                                                                                                                                                   |              |                               |   |                                                                                                                                                        |                    |
| Jezierski et al.<br>(2021a) [122]    | Authors in<br>Poland,<br>United<br>Kingdom and<br>United States<br>of America;<br>participants<br>were<br>international | 324 cat owners                                            | 87.6% female,<br>11.7% male<br><br>Mean age 39                                                                                                                                                                                            | Cats         | Cross-<br>sectional<br>survey | - | Changes in cat's<br>care, behavior<br>and health during<br>pandemic;<br>difficulties and/or<br>advantages of<br>having a cat<br>during the<br>pandemic | May - June<br>2020 |
| Jezierski et al.<br>(2021b) [123]    | Authors in<br>Poland,<br>United<br>Kingdom and<br>United States<br>of America;<br>participants<br>were<br>international | 688 dog<br>owners                                         | 88.2% female,<br>11.8% male<br><br>Mean age 43                                                                                                                                                                                            | Dogs         | Cross-<br>sectional<br>survey | - | Changes in dog<br>care, behavior<br>and health during<br>pandemic;<br>difficulties and/or<br>advantages of<br>having a dog<br>during the<br>pandemic   | May – June<br>2020 |
| Johnson &<br>Volsche (2021)<br>[124] | United States<br>of America                                                                                             | 234 adults<br>with at least<br>one<br>companion<br>animal | 82.9%<br>cisgender<br>female, 11.5%<br>cisgender male,<br>2.1% gender<br>non-<br>conforming,<br>1.3% who<br>identified as<br>queer, 0.9%<br>transgender<br>female, 0.9%<br>non-binary,<br>0.4% did not<br>answer<br><br>Age group<br>most | Not reported | Cross-<br>sectional<br>survey | - | Changes in<br>relationship with<br>pet during<br>shelter-in-place;<br>role of animals in<br>the home;<br>attachment to pets                            | Not reported       |

|                                 |                                                                          |                                                        |                                                                                                    |                                                 |                        |                                                                                                                                                                                       |                                                                                                             |                       |
|---------------------------------|--------------------------------------------------------------------------|--------------------------------------------------------|----------------------------------------------------------------------------------------------------|-------------------------------------------------|------------------------|---------------------------------------------------------------------------------------------------------------------------------------------------------------------------------------|-------------------------------------------------------------------------------------------------------------|-----------------------|
|                                 |                                                                          |                                                        | represented<br>was 25-35<br>(30.3%)                                                                |                                                 |                        |                                                                                                                                                                                       |                                                                                                             |                       |
| Junça-Silva et al. (2022) [125] | Portugal                                                                 | 320 teleworkers with pets, 81 teleworkers without pets | Non-pet owners: 51% male<br><br>Mean age 32.09<br><br>Pet owners: 62% female<br><br>Mean age 31.87 | Dogs                                            | Cross-sectional survey | Quality of telework experience (effectiveness/ productivity, organizational trust, interference between home and work life, flexibility); positive affect; self-rated job performance | Emotional attachment to pets; physical closeness to pets                                                    | February - March 2021 |
| Kirnan et al. (2022) [126]      | United States of America                                                 | 4 college students with emotional support animals      | 75% female, 25% male                                                                               | 3 participants had cats, 1 had a bearded dragon | Qualitative interviews | General feelings during COVID-19                                                                                                                                                      | -                                                                                                           | Not reported          |
| Kogan et al. (2021a) [127]      | Authors in United States of America; participants were international     | 5,061 dog or cat owners                                | 89% female, 10% male, 1% non-binary<br><br>Age group most represented was 40-59 (43%)              | Dogs, cats                                      | Cross-sectional survey | -                                                                                                                                                                                     | Impact of pets on COVID-related feelings; bond with pet                                                     | March - May 2020      |
| Kogan et al. (2021b) [128]      | Authors in the United States of America; participants were international | 4,105 dog owners                                       | 88.3% female, 10.8% male, 0.8% non-binary, 0.1% did not answer                                     | Dogs                                            | Cross-sectional survey | Social support; frustration                                                                                                                                                           | Changes in time spent with dog; changes in bond with dog; level of bond with dog; changes in dog behaviors; | March – May 2020      |

|                                        |                                                                                            |                                |                                                                                                      |         |                               |                                                                   |                                                                                                                                                                                                                                                                        |                       |
|----------------------------------------|--------------------------------------------------------------------------------------------|--------------------------------|------------------------------------------------------------------------------------------------------|---------|-------------------------------|-------------------------------------------------------------------|------------------------------------------------------------------------------------------------------------------------------------------------------------------------------------------------------------------------------------------------------------------------|-----------------------|
|                                        |                                                                                            |                                |                                                                                                      |         |                               |                                                                   | veterinary care;<br>dog-related<br>concerns;<br>psychological<br>impact of having<br>dogs during the<br>pandemic                                                                                                                                                       |                       |
| Kogan et al.<br>(2021c) [129]          | Authors in<br>the United<br>States of<br>America;<br>participants<br>were<br>international | 956 cat owners                 | 91.9% female,<br>7.8% male,<br>0.3% non-<br>binary                                                   | Cats    | Cross-<br>sectional<br>survey | Social support;<br>frustration                                    | Changes in time<br>spent with cat;<br>changes in bond<br>with cat;<br>veterinary care;<br>other cat-related<br>concerns; changes<br>in behavior;<br>psychological<br>impact of having<br>cats during the<br>pandemic                                                   | March – May<br>2020   |
| Koochaknejad<br>et al. (2022)<br>[130] | Authors in<br>Iran;<br>participants<br>were<br>international                               | 168 home<br>aquarium<br>owners | 56.5% male,<br>38.7% female,<br>4.8% non-<br>binary<br><br>44.6% aged 15-<br>24, 55.4% aged<br>25-64 | Fish    | Cross-<br>sectional<br>survey | -                                                                 | Belief that<br>aquarium had<br>stress-relieving<br>benefits during<br>pandemic;<br>thoughts about<br>giving up non-<br>fish pets due to<br>perceiving them<br>to be at risk of<br>coronaviruses;<br>money spent on<br>aquariums;<br>welfare of fish<br>during pandemic | March – April<br>2021 |
| Krouzecky et<br>al. (2022) [131]       | Authors in<br>Austria;<br>unclear<br>where                                                 | 242 animal<br>caregivers       | 83.8% female,<br>15.4% male,<br>0.8% other                                                           | Various | Cross-<br>sectional<br>survey | Depressive<br>symptoms;<br>quality of life;<br>loneliness; social | Emotional<br>attachment to<br>companion<br>animal; opinion of                                                                                                                                                                                                          | Not reported          |

|                               | participants<br>were from                                                                                                                                     |                            | Mean age 36                                                                               |                       |                               | support;<br>pandemic-related<br>stressors/concerns                                                                                                | the animals' role<br>during the<br>pandemic and in<br>the management<br>of Long-Covid |                                                                                |
|-------------------------------|---------------------------------------------------------------------------------------------------------------------------------------------------------------|----------------------------|-------------------------------------------------------------------------------------------|-----------------------|-------------------------------|---------------------------------------------------------------------------------------------------------------------------------------------------|---------------------------------------------------------------------------------------|--------------------------------------------------------------------------------|
| Kuehne et al.<br>(2022) [132] | Authors in<br>United<br>Kingdom;<br>participants<br>from<br>Germany<br>(33%), United<br>Kingdom<br>(29%), Hong<br>Kong (18%),<br>Ireland (8%),<br>other (12%) | 49 adults                  | 31% male, 69%<br>female<br><br>Mean age 36.5<br>(range 23-61)                             | Dogs, cats,<br>others | Cross-<br>sectional<br>survey | General<br>wellbeing; social<br>connectedness<br>and social<br>assurance;<br>coronavirus<br>anxiety                                               | Pet attachment                                                                        | Not reported                                                                   |
| Lau & Oliva<br>(2023) [133]   | Australia                                                                                                                                                     | 534 adults<br>living alone | Gender and age<br>reported for<br>various sub-<br>groups but not<br>the overall<br>sample | Dogs, cats            | Cross-<br>sectional<br>survey | Loneliness;<br>COVID-19<br>experiences;<br>mindfulness;<br>mindfulness or<br>meditation<br>experiences, both<br>during lockdown<br>and in general | Pet ownership –<br>dog / cat / none;<br>dog-walking<br>frequency                      | August –<br>September<br>2020                                                  |
| Law et al.<br>(2022) [134]    | New Zealand                                                                                                                                                   | 261 adults                 | 7% male, 93%<br>female<br><br>Mean age 43.87                                              | Not reported          | Longitudinal<br>surveys       | Anxiety;<br>depression;<br>positive mood;<br>perceived risk of<br>getting COVID-<br>19; worry about<br>contracting<br>COVID-19                    | Pet owner –<br>yes/no                                                                 | T1: May 2020<br>T2: August –<br>September<br>2020<br>T3: March –<br>April 2021 |
| Lee et al.<br>(2022) [135]    | Korea                                                                                                                                                         | 249 dog<br>owners          | 83.1% female,<br>16.9% male                                                               | Dogs                  | Cross-<br>sectional<br>survey |                                                                                                                                                   | Attachment to<br>dogs; perceived<br>outcomes of dog<br>walking                        | Fall 2021                                                                      |

|                                         |                          |                                                 | Age group most represented was 29 or under (43.4%)                                                                      |              |                        |                                                                                                                                         |                                                                                                                                                                                                                                                                                 |                                          |
|-----------------------------------------|--------------------------|-------------------------------------------------|-------------------------------------------------------------------------------------------------------------------------|--------------|------------------------|-----------------------------------------------------------------------------------------------------------------------------------------|---------------------------------------------------------------------------------------------------------------------------------------------------------------------------------------------------------------------------------------------------------------------------------|------------------------------------------|
| Lima et al. (2022) [136]                | Portugal                 | 509 adults (345 dog owners, 164 non-dog owners) | Dog owners: 79% female, 21% male<br><br>Mean age 38<br><br>People without dogs: 69% female, 31% male<br><br>Mean age 40 | Dogs         | Cross-sectional survey | COVID-19 quarantine; social support; anxiety; depression                                                                                | Lived with a dog – yes/no; lived with any other companion animal – yes/no; if dogs, dog-owner relationship was assessed, including emotional closeness and perceived costs; dog owners also reported time spent walking and whether they had considered relinquishing their pet | May – June 2020                          |
| Lukoševičiūtė & Šmigelskas (2022) [137] | Lithuania                | 19 adolescents                                  | 52.6% female, 47.4% male<br><br>Mean age 13.8, range 11-17                                                              | Not reported | Qualitative interviews | Mental health during pandemic; hardest part of pandemic; what helped to overcome difficulties; new discoveries the pandemic has brought | -                                                                                                                                                                                                                                                                               | April - July 2021                        |
| Martin et al. (2021) [138]              | United States of America | 768 dog owners, 767 potential dog owners        | Dog owners: 58.2% female, 41.67% male,                                                                                  | Dogs         | Cross-sectional survey | Perceived social support; depression;                                                                                                   | Attitude towards pets; commitment to pets                                                                                                                                                                                                                                       | November 2020; additional 350 dog owners |

|                                    |                                                                         |                                        |                                                                                                                                                                    |                                                                                                                            |                        |                                          |                                                                                                                                                    |                                                      |
|------------------------------------|-------------------------------------------------------------------------|----------------------------------------|--------------------------------------------------------------------------------------------------------------------------------------------------------------------|----------------------------------------------------------------------------------------------------------------------------|------------------------|------------------------------------------|----------------------------------------------------------------------------------------------------------------------------------------------------|------------------------------------------------------|
|                                    |                                                                         | (interested in having a dog in future) | 0.13% prefer not to say<br><br>Mean age 45.43, range 18-82<br><br>Potential dog owners: 58.28% female, 41.59% male, 0.13% other<br><br>Mean age 42.41, range 18-99 |                                                                                                                            |                        | anxiety; happiness                       |                                                                                                                                                    | and 350 potential dog owners recruited February 2021 |
| Martinez-Caja et al. (2022a) [139] | Authors in Belgium and the Netherlands; participants were international | 6,520 adults (83.7% pet owners)        | 86.7% female, 13.1% male, 0.2% other<br><br>Age group most represented was 26-35 (24.4%)                                                                           | Dogs, cats, horses, rabbits, birds, fish, small rodents, other                                                             | Cross-sectional survey | Loneliness; positive and negative affect | Pet ownership – yes/no; pet owners reported how many animals they had, species of animals, and completed a measure of human-animal bond            | April – May 2020                                     |
| Martinez-Caja et al. (2022b) [140] | Authors in Belgium and the Netherlands; participants were international | 5,454 pet owners                       | 10.14% male, 89.38% female, 0.48% other<br><br>Age group most represented was 26-35 (24.27%)                                                                       | Dogs, cats, horses, rabbits, birds, small rodents, fish, reptiles, other (e.g. goats, sheep, alpacas, tarantulas, ferrets) | Cross-sectional survey | -                                        | Type of animal; relationship with pets; changes in pets' routine; time spent with pets and enjoyment of time with pets; behavioral changes in pets | April – May 2020                                     |

|                               |                          |                                                                                |                                                                                                                                                                                                                    |                                                                                                           |                        |                                                                                                                                          |                                                                                                                           |                   |
|-------------------------------|--------------------------|--------------------------------------------------------------------------------|--------------------------------------------------------------------------------------------------------------------------------------------------------------------------------------------------------------------|-----------------------------------------------------------------------------------------------------------|------------------------|------------------------------------------------------------------------------------------------------------------------------------------|---------------------------------------------------------------------------------------------------------------------------|-------------------|
| Matijczak et al. (2021) [141] | United States of America | 1,453 sexual and gender minority individuals who lived with a companion animal | 89.7% cisgender female, 7% cisgender male, 1.1% genderqueer / gender non-conforming, 0.2% transgender male, 0.1% prefer to self-describe, 1.7% multiple identities, 0.2% prefer not to say<br><br>Age not reported | Dogs, cats, fish, reptiles, birds, small mammals, horses, other (e.g. cow, pig, donkey, chicken, axolotl) | Cross-sectional survey | -                                                                                                                                        | Whether concerns about pet's welfare would lead to delaying or avoiding COVID-19 testing or treatment; attachment to pets | April – July 2020 |
| McDonald et al. (2021) [142]  | United States of America | 1,942 adults with at least one companion animal                                | 89.8% cisgender female, 7.0% cisgender male, 1.1% genderqueer/ gender non-conforming, 0.1% transgender female, 0.5% transgender male, 1.4% multiple identities, 0.3% missing data                                  | Various                                                                                                   | Cross-sectional survey | Psychological adjustment (anxiety, depression, hostility, interpersonal sensitivity, obsessive-compulsive, phobic anxiety, somatization) | Attachment to pets                                                                                                        | April - July 2020 |



|                                |                             |                                                                                                                                                                              |                                                                |                                                 |                               |                                                                                                                                                         |                                                                                                                               |                                                                                               |
|--------------------------------|-----------------------------|------------------------------------------------------------------------------------------------------------------------------------------------------------------------------|----------------------------------------------------------------|-------------------------------------------------|-------------------------------|---------------------------------------------------------------------------------------------------------------------------------------------------------|-------------------------------------------------------------------------------------------------------------------------------|-----------------------------------------------------------------------------------------------|
|                                |                             |                                                                                                                                                                              | Mean age 39.68,<br>range 18-85                                 |                                                 |                               |                                                                                                                                                         |                                                                                                                               |                                                                                               |
| Moore et al.<br>(2020) [143]   | Canada                      | 1,472 parents<br>of children or<br>youth                                                                                                                                     | 47% female<br><br>Mean age 45.12                               | Dogs                                            | Cross-<br>sectional<br>survey | Child movement<br>behaviors; change<br>in child<br>movement and<br>play behaviors;<br>parental support<br>for child's<br>movement and<br>play behaviors | Dog ownership –<br>yes/no                                                                                                     | Approximately<br>1 month after<br>COVID was<br>declared a<br>global<br>pandemic by<br>the WHO |
| Morgan et al.<br>(2020) [144]  | Israel                      | 2,906 dog<br>owners                                                                                                                                                          | Not reported                                                   | Dogs                                            | Cross-<br>sectional<br>survey | Effect of<br>pandemic on<br>stress; effect of<br>pandemic on<br>financial<br>wellbeing;<br>concerns about<br>own health                                 | Wellbeing of dog;<br>behavior of dog<br>during lockdown;<br>frequency of dog-<br>walking                                      | March – April<br>2020                                                                         |
| Morris et al.<br>(2021) [145]  | Canada                      | 12 people with<br>companion<br>animals, who<br>met the low-<br>income<br>threshold to<br>access support<br>for veterinary<br>fees from the<br>Vancouver<br>Humane<br>Society | Not reported                                                   | Not reported                                    | Qualitative<br>interviews     | -                                                                                                                                                       | COVID-related<br>challenges in<br>accessing<br>veterinary care;<br>resources and<br>support to<br>address these<br>challenges | December 2020<br>– May 2021                                                                   |
| Mueller et al.<br>(2021) [146] | United States<br>of America | 1,033 early<br>adolescents<br>(T1)<br><br>357 early<br>adolescents<br>(T2)                                                                                                   | T1: 50% female,<br>49% male, 1%<br>other<br><br>Mean age 12.69 | Dogs, cats,<br>reptiles, fish,<br>horses, other | Follow-up<br>study            | Loneliness;<br>coping with stress                                                                                                                       | Pet in the family –<br>yes/no; average<br>daily time spent<br>with pet; pet<br>attachment                                     | T1: October -<br>December<br>2019; T2: June -<br>July 2020                                    |

|                                        |                                                                                |                                                                        |                                                                                                            |                                                                                           |                                                                                                                            |                                                                                                                      |                                                                                        |                         |
|----------------------------------------|--------------------------------------------------------------------------------|------------------------------------------------------------------------|------------------------------------------------------------------------------------------------------------|-------------------------------------------------------------------------------------------|----------------------------------------------------------------------------------------------------------------------------|----------------------------------------------------------------------------------------------------------------------|----------------------------------------------------------------------------------------|-------------------------|
|                                        |                                                                                |                                                                        | T2: 65% female,<br>34% male, 1%<br>other                                                                   |                                                                                           |                                                                                                                            |                                                                                                                      |                                                                                        |                         |
|                                        |                                                                                |                                                                        | Mean age: 13.02                                                                                            |                                                                                           |                                                                                                                            |                                                                                                                      |                                                                                        |                         |
| Mueller et al.<br>(2022) [147]         | United States<br>of America                                                    | 6,069<br>adolescents                                                   | 49.5% female,<br>50.5% male<br><br>Mean age 12.57                                                          | Dogs, cats,<br>horses, fish,<br>small<br>animals,<br>other                                | Cross-<br>sectional<br>survey                                                                                              | Positive affect;<br>perceived stress;<br>healthy coping<br>behaviors;<br>walking routine;<br>regular outdoor<br>time | Pet in the family –<br>yes/no                                                          | June 2020               |
| Muzzatti &<br>Grieve (2022)<br>[148]   | Canada and<br>United States<br>of America                                      | Not reported                                                           | Not reported                                                                                               | Not reported                                                                              | Mixed-<br>methods:<br>surveys,<br>interviews,<br>discussions<br>among<br>veterinary<br>technicians<br>and<br>technologists | Not reported                                                                                                         | Not reported                                                                           | Not reported            |
| Namekata &<br>Yamamoto<br>(2021) [149] | Japan                                                                          | 180 university<br>students                                             | 68.9% female,<br>31.1% male<br><br>Mean age 19.4,<br>range 18-23                                           | Dogs, cats,<br>small<br>animals,<br>other                                                 | Cross-<br>sectional<br>survey                                                                                              | Perceived<br>difficulties of the<br>pandemic; ways<br>of relieving stress;<br>mood states                            | Companion<br>animal<br>ownership; type<br>of pet; attachment<br>to companion<br>animal | June - July<br>2020     |
| O'Connor et<br>al. (2022) [150]        | United States<br>(unclear if<br>some<br>participants<br>were<br>international) | 284 people<br>who had lost a<br>pet during the<br>COVID-19<br>pandemic | 206 females, 31<br>males, 7 non-<br>binary<br><br>Age group<br>most<br>represented<br>was 18-30<br>(81.2%) | Dogs, cats,<br>reptiles, fish,<br>birds,<br>rodents,<br>pigs, exotic<br>animals,<br>other | Cross-<br>sectional<br>survey                                                                                              | Other losses<br>during the<br>pandemic;<br>isolation; social<br>support; stress;<br>grief                            | Attachment to<br>pets; continuing<br>bonds to pets                                     | February –<br>June 2021 |

|                            |                          |               |                                                                                                                                                                                                                                                                                                                |            |                                                                                                                                                                                       |                                                                                             |                                                                                                                                                                        |                                                                                                                                                                                                                       |
|----------------------------|--------------------------|---------------|----------------------------------------------------------------------------------------------------------------------------------------------------------------------------------------------------------------------------------------------------------------------------------------------------------------|------------|---------------------------------------------------------------------------------------------------------------------------------------------------------------------------------------|---------------------------------------------------------------------------------------------|------------------------------------------------------------------------------------------------------------------------------------------------------------------------|-----------------------------------------------------------------------------------------------------------------------------------------------------------------------------------------------------------------------|
| Ogata et al. (2023) [151]  | United States of America | 4,237 adults  | <p>Non-pet owners: 269 female, 381 male, &lt;5 non-binary</p> <p>Dog owners: 850 female, 888 male, 12 non-binary</p> <p>Cat owners: 907 female, 845 male, 18 non-binary</p> <p>Mean age at baseline: 37 (range 19-71) for non-pet owners, 37 (range 18-79 for dog owners), 36 (range 18-72) for cat owners</p> | Dogs, cats | Longitudinal                                                                                                                                                                          | Perceived stress; perceived loneliness                                                      | <p>Characteristics of pet; length of ownership; whether respondent was primary caregiver; other household pets; owner-pet relationship (i.e., perceived closeness)</p> | <p>Cohort established June 2020; pre-pandemic (February 2020) and lockdown (April 2020) data collected retrospectively; follow-up surveys in September 2020, January 2021, April 2021, August 2021, December 2021</p> |
| Oliva & Green (2021) [152] | Australia                | 67 dog owners | <p>88% female, 12% male</p> <p>Age not reported</p>                                                                                                                                                                                                                                                            | Dogs       | <p>Intervention trial: six-week Dog Assisted Mindfulness (DAM) involving guided imagery vs. Dog Interactions (DI) involving different play activities with dogs vs. control group</p> | <p>Mindfulness; loneliness; perceptions of interventions (for intervention groups only)</p> | <p>Perceived emotional closeness to dogs</p>                                                                                                                           | <p>August – October 2020</p>                                                                                                                                                                                          |

|                                 |                                         |                                                                                             |                                                                                                                                                                    |                   |                        |                                                                                                                                                                                                             |                                                                                                                                                |                  |
|---------------------------------|-----------------------------------------|---------------------------------------------------------------------------------------------|--------------------------------------------------------------------------------------------------------------------------------------------------------------------|-------------------|------------------------|-------------------------------------------------------------------------------------------------------------------------------------------------------------------------------------------------------------|------------------------------------------------------------------------------------------------------------------------------------------------|------------------|
| Oliva & Johnston (2021) [153]   | Australia                               | 384 people who lived with no other humans (30.2% lived with a dog, 32.81% lived with a cat) | 14.1% male, 85.4% female, 0.3% non-binary, 0.3% unspecified<br><br>Mean age 50.92 (range 23 – 89)                                                                  | Dogs, cats        | Cross-sectional survey | Mindfulness and meditation experience; loneliness; depression, anxiety and stress                                                                                                                           | How being a pet owner impacted their experience of COVID-19; how the pandemic was perceived to have affected pets; pet interaction             | May 2020         |
| Oliver-Hall et al. (2021) [154] | United Kingdom                          | 352 (189 people with multiple sclerosis, 163 controls)                                      | People with multiple sclerosis: 23% female, 76% male, 1% not answered<br><br>Mean age 54<br><br>Controls: 47% female, 50% male, 2% not answered<br><br>Mean age 53 | Dogs, cats, other | Cross-sectional survey | Satisfaction with (participation in) social roles; quality of life; self-efficacy                                                                                                                           | Pet ownership – yes/no; type of pet; number of pets; attachment to pets; perceived role of pets during pandemic; pet-related causes of concern | Not reported     |
| Oomen et al. (2021) [155]       | Belgium, Netherlands and United Kingdom | 1,044 (613 with a diagnosis of autism)                                                      | 68.8% female, 29.7% male, 16 people – other<br><br>Mean age, autism group: 38.36, range 18-78<br><br>Mean age, non-autism group: 38.38, range 18-81                | Not reported      | Cross-sectional survey | COVID-19 experiences; depression and anxiety; worries; social life and routines; mental health needs during pandemic; which changes in everyday life were most difficult, most stressful, and most pleasant | Living with pets – yes/no                                                                                                                      | April - May 2020 |

|                                          |                |                                                                                                     |                                                                                                  |      |                                |   |                                                                                                                                                                                                                                                                                                                                                                                                                                      |                          |
|------------------------------------------|----------------|-----------------------------------------------------------------------------------------------------|--------------------------------------------------------------------------------------------------|------|--------------------------------|---|--------------------------------------------------------------------------------------------------------------------------------------------------------------------------------------------------------------------------------------------------------------------------------------------------------------------------------------------------------------------------------------------------------------------------------------|--------------------------|
| Owczarczak-Garstecka et al. (2021) [156] | United Kingdom | 584 dog owners                                                                                      | 88.7% female, 10.5% male, 0.9% not disclosed<br><br>Age group most represented was 30-50 (43.2%) | Dogs | Cross-sectional survey         | - | Number of dogs in household; their size, age and sex; dog's perceived energy levels; relationship with dog; frequency of dog's interactions with people and dogs pre-lockdown; dog's recall reliability; frequency and duration of dog walking during lockdown and before; perceived changes in dogs' interactions; who walks dog; changes in human's walking habits; changes in location of dog walks; perceptions of dog ownership | May - June 2020          |
| Packer et al. (2021) [157]               | United Kingdom | Owners of 1,148 puppies purchased in 2019 and owners of 4,369 puppies purchased during the pandemic | 2019: 92% female<br>2020: 90% female<br><br>Age group most represented was 45-54                 | Dogs | Comparison study using surveys | - | Motivations for purchasing a puppy; pre-purchase behaviors; purchase behaviors; COVID-specific impacts                                                                                                                                                                                                                                                                                                                               | November – December 2020 |

|                               |                   |                                                                                                |                                                                                                                                                                                                         |                        |                                                                                         |   |                                                                                                                                 |                                                                                                                                    |
|-------------------------------|-------------------|------------------------------------------------------------------------------------------------|---------------------------------------------------------------------------------------------------------------------------------------------------------------------------------------------------------|------------------------|-----------------------------------------------------------------------------------------|---|---------------------------------------------------------------------------------------------------------------------------------|------------------------------------------------------------------------------------------------------------------------------------|
|                               |                   |                                                                                                | (25.2% in 2019,<br>24.6% in 2020)                                                                                                                                                                       |                        |                                                                                         |   |                                                                                                                                 |                                                                                                                                    |
| Packer et al.<br>(2023) [158] | United<br>Kingdom | 1,148 '2019<br>puppies', 4,369<br>'2020<br>pandemic<br>puppies', 2,080<br>'2021 puppies'       | 94.8% female<br>(owners of 2021<br>puppies), 90%<br>female (owners<br>of 2020<br>puppies), 92%<br>female (owners<br>of 2019<br>puppies)<br><br>Age group<br>most<br>represented<br>was 45-54<br>(24.1%) | Dogs                   | Comparison<br>study using<br>surveys                                                    | - | Motivations for<br>purchasing a<br>puppy; pre-<br>purchase<br>behaviors;<br>purchase<br>behaviors;<br>COVID-specific<br>impacts | February –<br>April 2022                                                                                                           |
| Pawar et al.<br>(2021) [159]  | India             | 100 people<br>with<br>companion<br>animals                                                     | Not reported                                                                                                                                                                                            | Dogs, cats             | Cross-<br>sectional<br>survey                                                           | - | Behavioral<br>changes in pets;<br>difficulties<br>fulfilling<br>pets' needs in<br>lockdown                                      | Not reported                                                                                                                       |
| PDSA (2020)<br>[160]          | United<br>Kingdom | February 2020<br>survey: 4,767<br>pet owners<br><br>August 2020<br>survey: 4,103<br>pet owners | Not reported                                                                                                                                                                                            | Dogs, cats,<br>rabbits | Cross-<br>sectional<br>survey (with<br>some<br>comparisons<br>to other time-<br>points) | - | Animal wellbeing<br>and behavior;<br>impact of<br>pandemic on<br>animals                                                        | February 2020,<br>compared to<br>data from<br>August 2020<br>and annual<br>surveys dating<br>back to 2011<br>for trend<br>analysis |
| PDSA (2021)<br>[161]          | United<br>Kingdom | 4,579 pet<br>owners                                                                            | Not reported                                                                                                                                                                                            | Dogs, cats,<br>rabbits | Cross-<br>sectional<br>survey                                                           | - | Animal wellbeing<br>and behavior;<br>impact of<br>pandemic on<br>animals                                                        | May 2021                                                                                                                           |

|                                  |                                                                  |                                         |                                                                                                    |                                                                           |                                      |                                                                                               |                                                                                                                                                                                                 |                                                                                |
|----------------------------------|------------------------------------------------------------------|-----------------------------------------|----------------------------------------------------------------------------------------------------|---------------------------------------------------------------------------|--------------------------------------|-----------------------------------------------------------------------------------------------|-------------------------------------------------------------------------------------------------------------------------------------------------------------------------------------------------|--------------------------------------------------------------------------------|
| Phillipou et al.<br>(2021) [162] | Australia                                                        | 263 (138 pet owners vs. 125 non-owners) | Pet owners:<br>88% female<br><br>Mean age 25.85<br><br>Non-owners:<br>80% female<br>Mean age 26.45 | Cats, dogs                                                                | Cross-sectional survey               | Loneliness; resilience; quality of life; negative emotional states                            | Ownership of a cat or dog – yes/no                                                                                                                                                              | September 2020                                                                 |
| Piotti et al.<br>(2021) [163]    | Authors in Italy, Greece and UK; participants were international | 235 pet owners                          | 85% female, 14% male, 1% other/prefer not to say<br><br>Age group most represented was 35-44 (30%) | Dogs, cats                                                                | Cross-sectional survey               | Perceived risk of COVID-19; social interactions; financial effects of the pandemic; wellbeing | Pet quality of life; pet-owner relationship                                                                                                                                                     | May – July 2020                                                                |
| Platto et al.<br>(2022) [164]    | China                                                            | 261 dog or cat owners                   | Not reported                                                                                       | Dogs, cats                                                                | Cross-sectional survey               | -                                                                                             | Type of pet owned (dog / cat / both); difficulties finding pet food and veterinary care during lockdown; management of pets; behavioral issues; companion animal bond; stress-related behaviors | July 2020 – June 2021                                                          |
| Ratschen et al.<br>(2020) [165]  | United Kingdom                                                   | 5,926 adults                            | 78.6% female, 20.6% male, 0.6% other, 0.2% prefer not to say                                       | Dogs, cats, small mammals, birds, fish, reptiles or amphibians, horses or | Cross-sectional retrospective survey | Mental wellbeing; mental health; loneliness                                                   | Animals in the household – yes/no; how many and which species; comfort from companion animals (Comfort                                                                                          | April - June 2020; participants provided current data and also retrospectively |

|                             |                          |                                                                                                  |                                                                  |                             |                        |                                                                          |                                                                                                                                                                                                       |                                 |
|-----------------------------|--------------------------|--------------------------------------------------------------------------------------------------|------------------------------------------------------------------|-----------------------------|------------------------|--------------------------------------------------------------------------|-------------------------------------------------------------------------------------------------------------------------------------------------------------------------------------------------------|---------------------------------|
|                             |                          |                                                                                                  | Age group most represented was 45-54 (23.8%)                     | ponies, farm animals, other |                        |                                                                          | from Companion Animals Scale); role of companion animals during lockdown                                                                                                                              | provided 'before lockdown' data |
| Reniers et al. (2022) [166] | Netherlands              | 9 (5 older adults receiving long-term care at home, 4 family caregivers of people with dementia) | 55% female, 45% male<br><br>Mean age 72.1, range 62-82           | Dogs, cats                  | Qualitative interviews | Experiences and quality of life during the pandemic                      | Bond with companion animals; change in significance of pets; benefits and challenges of having a pet during lockdown                                                                                  | May - September 2021            |
| Ribeiro et al. (2023) [167] | Brazil                   | 300 dog owners                                                                                   | 52% female, 48% male<br><br>Age range 25 – 44                    | Dogs                        | Cross-sectional survey | Quality of life                                                          | Environment where animal lived; changes in routine; behaviors; physical health; quality of life                                                                                                       | July – September 2020           |
| Riggio et al. (2022) [168]  | Italy                    | 548 cat owners                                                                                   | 81.6% female<br><br>Age group most represented was 36-45 (30.7%) | Cats                        | Cross-sectional survey | Effects of confinement on emotions, finances, health and quality of life | How pet-owner relationship had been affected by the pandemic; how pet's quality of life was affected by pandemic; whether they became angry with their pet more frequently; behavioral changes in pet | April 2020                      |
| Rombach & Dean (2021) [169] | United States of America | 206 pet owners                                                                                   | 156 males, 50 females                                            | Cats, dogs                  | Cross-sectional survey | -                                                                        | Pet care and engagement; experiences with pet food                                                                                                                                                    | July 2021                       |



|                                    |                                                    |                                     |                                                     |                                                                                  |                                                                                    |                                                                                                                                                                                                                     |                                                                                                           |                           |
|------------------------------------|----------------------------------------------------|-------------------------------------|-----------------------------------------------------|----------------------------------------------------------------------------------|------------------------------------------------------------------------------------|---------------------------------------------------------------------------------------------------------------------------------------------------------------------------------------------------------------------|-----------------------------------------------------------------------------------------------------------|---------------------------|
|                                    |                                                    |                                     | Age group most represented was 25-34 (63.1%)        |                                                                                  |                                                                                    |                                                                                                                                                                                                                     | insecurity and anxiety; shopping for and feeding pets during the pandemic                                 |                           |
| Sacchettino et al. (2023) [170]    | Italy                                              | 310 dog owners                      | 80.08% female, 19.92% male                          | Dogs                                                                             | Comparison study of dogs who were puppies in lockdown vs. dogs born after lockdown | -                                                                                                                                                                                                                   | Dog personality and behavior                                                                              | February – September 2022 |
|                                    |                                                    |                                     | Age group most represented was 30-40 (30.15%)       |                                                                                  |                                                                                    |                                                                                                                                                                                                                     |                                                                                                           |                           |
| Sánchez-Ferrer et al. (2022) [171] | Spain                                              | 3,890 parents reporting on children | Children: 51.4% male<br>Mean age 6.78               | Not reported                                                                     | Cross-sectional survey                                                             | Child's acceptance of and adaptation to the pandemic; perception of whether child might have trouble returning to normal activities; sleep problems; appetite changes; screen time; emotional state during pandemic | Pets in the home – yes/no                                                                                 | April 2020                |
| Scholtz (2022) [172]               | Author in South Africa; participants international | 77 remote workers                   | 90% female, 9% male, 1% missing data<br>Mean age 43 | Dogs, cats, other (but all participants who chose 'other' also had dogs or cats) | Cross-sectional survey with qualitative descriptive responses                      | -                                                                                                                                                                                                                   | 'Do you have anything to add regarding your experience as a pet owner and remote worker during COVID-19?' | January - April 2022      |

|                                |                                                                                                    |                                |                                                                                                                |                                                                                                       |                                                                |                                |                                                                                                                                                                      |                                                                                              |
|--------------------------------|----------------------------------------------------------------------------------------------------|--------------------------------|----------------------------------------------------------------------------------------------------------------|-------------------------------------------------------------------------------------------------------|----------------------------------------------------------------|--------------------------------|----------------------------------------------------------------------------------------------------------------------------------------------------------------------|----------------------------------------------------------------------------------------------|
| Shah et al. (2021) [173]       | Authors in Pakistan; participants international                                                    | 678 individuals                | 57.2% female, 42.8% male<br><br>Age groups most represented were 18-24 and 25-34 (% not reported)              | Not reported                                                                                          | Cross-sectional survey                                         | Depression, anxiety and stress | 'Impact of pets'                                                                                                                                                     | Not reported – 'during quarantine / lockdown'                                                |
| Sherlock et al. (2023) [174]   | Ireland                                                                                            | 662 dog owners                 | 79% female, 20% male, 1% non-binary<br><br>Age group most represented was 18-24 (36%)                          | Dogs                                                                                                  | Cross-sectional survey                                         | -                              | Dog's lifestyle and care, including diet, walking, parasite control practices, veterinary care                                                                       | January 2022                                                                                 |
| Sherwell et al. (2023) [175]   | Authors in United Kingdom and United States of America; unclear if participants were international | 1,106 dog owners (at baseline) | Not reported                                                                                                   | Dogs                                                                                                  | Longitudinal                                                   | -                              | Dog behaviours; changes in management of dogs                                                                                                                        | Recruitment took place May – July 2021; surveys were completed each month for up to 8 months |
| Shoesmith et al. (2021a) [176] | United Kingdom                                                                                     | 5,323 adults                   | 79.3% female, 20% male, 0.5% other, 0.2% prefer not to say<br><br>Age group most represented was 45-54 (24.8%) | Dogs, cats, small mammals, birds, fish, reptiles or amphibians, horses or ponies, farm animals, other | Cross-sectional retrospective survey with open-ended questions | Mental health                  | Do you have animals that live with or near you that you or anyone in your household are the main caretaker for – yes/no; how many animals; which species; changes in | April – June 2020                                                                            |

|                                |                |                                       |                                                                                                                  |                                                                                              |                                                         |                                                                                         |                                                                                                                                                                                                                                                                            |                      |
|--------------------------------|----------------|---------------------------------------|------------------------------------------------------------------------------------------------------------------|----------------------------------------------------------------------------------------------|---------------------------------------------------------|-----------------------------------------------------------------------------------------|----------------------------------------------------------------------------------------------------------------------------------------------------------------------------------------------------------------------------------------------------------------------------|----------------------|
|                                |                |                                       |                                                                                                                  |                                                                                              |                                                         |                                                                                         | animals' welfare and behavior; human-animal bond and interactions                                                                                                                                                                                                          |                      |
| Shoesmith et al. (2021b) [177] | United Kingdom | 934 companion animal owners           | 78.3% female, 20.7% male, 0.9% other, 0.1% prefer not to say<br><br>Age group most represented was 55-64 (27.3%) | Dogs, cats, small mammals, fish, horses or ponies, birds, reptiles, farm animals, amphibians | Cross-sectional survey with open-ended questions        | -                                                                                       | Open-ended question asking about experiences with animals during COVID-19                                                                                                                                                                                                  | April – June 2020    |
| Shoesmith et al. (2021c) [178] | United Kingdom | 249 people with severe mental illness | 46.6% cisgender female, 51.4% cisgender male, 2% transgender<br><br>Age group most represented was 45-54 (55%)   | Dogs, cats, small mammals, fish, birds, reptiles or amphibians, farm animals, other          | Cross-sectional survey including an open-ended question | General mental health; general physical health; global health and wellbeing; loneliness | Animals living with or near you which you or someone in the household are the main caretaker of – yes/no; species; engagement with companion animals if yes; free-text question asking for any other comments about what animals meant to participants during the pandemic | January – March 2021 |
| Tan et al. (2021) [179]        | Singapore      | 534 (431 pet owners, 103 non-owners)  | Pet owners: 89.3% female<br><br>Median age 33                                                                    | Dogs, cats, small mammals or birds                                                           | Cross-sectional survey                                  | Physical activity levels; general health, emotional wellbeing, energy                   | Sharing a house with a dog, cat, small mammal or bird – yes/no;                                                                                                                                                                                                            | May – July 2020      |

|                                              |                                                            |                                                                                                                   | Non-owners:<br>79.6% female                                |                       |                                        | and social<br>functioning                                                                                                           | attachment to<br>pets; main<br>caregiver or not;<br>level of<br>involvement with<br>pet care |                                                                                         |
|----------------------------------------------|------------------------------------------------------------|-------------------------------------------------------------------------------------------------------------------|------------------------------------------------------------|-----------------------|----------------------------------------|-------------------------------------------------------------------------------------------------------------------------------------|----------------------------------------------------------------------------------------------|-----------------------------------------------------------------------------------------|
|                                              |                                                            |                                                                                                                   | Median age 29                                              |                       |                                        |                                                                                                                                     |                                                                                              |                                                                                         |
| <b>van der Velpen et al.</b><br>(2022) [180] | Netherlands                                                | 5,017 older adults                                                                                                | 56.9% female<br><br>Mean age 68.7                          | Not reported          | Prospective longitudinal cohort study  | Mental and social health; healthcare utilization; loneliness; social isolation; social connectedness                                | Pet ownership – yes/no                                                                       | T1: April 2020; questionnaires completed at three time-points between April – July 2020 |
| Victor & Mayer (2023) [181]                  | South Africa                                               | 10 pet owners                                                                                                     | 100% female<br><br>Mean age 25.3 (range 22 – 29)           | Dogs (n=9), cat (n=1) | Qualitative interviews                 | Not reported                                                                                                                        | Not reported                                                                                 | Not reported                                                                            |
| Vučinić et al. (2022) [182]                  | Serbia                                                     | 216 dog owners                                                                                                    | 74% female, 26% male<br><br>85% aged 18-44, 15% aged 45-64 | Dogs                  | Cross-sectional survey                 | -                                                                                                                                   | Were dogs walked for at least 150 min/week before and during the state of emergency          | March – April 2020                                                                      |
| Wan et al. (2022) [183]                      | United States of America                                   | 187 employees with companion animals                                                                              | 50% male, 50% female<br><br>Mean age 36.66                 | Not reported          | Follow-up study with a 1-week time-lag | Job insecurity; stress; substance use; emotional exhaustion; depression                                                             | Pet attachment support                                                                       | April 2020                                                                              |
| Ward et al. (2021) [184]                     | United Kingdom (22 participants in Scotland, 2 in England) | 24 (5 veterinarians, 6 horse owners with horses at home, 5 horse owners with horses at an external establishment, | Not reported                                               | Horses                | Qualitative interviews                 | Challenges in the management of horses during the pandemic; conversations often drifted towards owners' mental health and wellbeing | -                                                                                            | May - July 2020                                                                         |

|                              |                          |                                                                                                                                            |                                                                            |            |                                                              |                                                      |                                                                                                                                                                       |                                                                                                      |
|------------------------------|--------------------------|--------------------------------------------------------------------------------------------------------------------------------------------|----------------------------------------------------------------------------|------------|--------------------------------------------------------------|------------------------------------------------------|-----------------------------------------------------------------------------------------------------------------------------------------------------------------------|------------------------------------------------------------------------------------------------------|
|                              |                          | 4 farriers, 4 equine welfare centre managers                                                                                               |                                                                            |            |                                                              |                                                      |                                                                                                                                                                       |                                                                                                      |
| Wells et al. (2022) [185]    | United Kingdom           | 249 adults (146 companion animal owners, 103 non-owners)                                                                                   | 78.3% female, 21.7% male<br><br>Age group most represented was 18-29 (53%) | Dogs, cats | Cross-sectional survey                                       | Depression; positive experiences; loneliness; stress | Ownership of cat or dog – yes/no; Attachment to pets                                                                                                                  | January 2021                                                                                         |
| Williams et al. (2020) [186] | United Kingdom           | 6,259 horse owners                                                                                                                         | Not reported                                                               | Horses     | Cross-sectional survey which included an open-ended question | -                                                    | Impact of pandemic on horse management; impact of pandemic on interactions with horse; whether financial implications of pandemic were predicted to affect horse care | March – April 2020                                                                                   |
| Woolley et al. (2022) [187]  | United Kingdom           | 1,265 (COVID-19 lifestyle surveys, compared to 12,451 surveys from previous years); illness data from 16,115 surveys from 4,110 dog owners | Not reported                                                               | Dogs       | Longitudinal                                                 | -                                                    | Exercise quantity; feeding; insurance status; sleeping location; baths; anti-parasite treatment; illnesses; veterinary care                                           | Data from March – July 2020 compared to data from the same dates in previous years from 2011 to 2019 |
| Wriedt (2022) [188]          | Author in United States; | 24 people who acquired a dog                                                                                                               | Not reported                                                               | Dogs       | Cross-sectional                                              | How COVID impacted life                              | Factors influencing                                                                                                                                                   | September 2021                                                                                       |

|                            | data on participant location not collected                           | between February – December 2020                                  |                                                                          |                                            | survey with open-ended questions |                                                                                                                             | decision to get a dog; experiences of having a new dog during the pandemic                                                                                                        |                              |
|----------------------------|----------------------------------------------------------------------|-------------------------------------------------------------------|--------------------------------------------------------------------------|--------------------------------------------|----------------------------------|-----------------------------------------------------------------------------------------------------------------------------|-----------------------------------------------------------------------------------------------------------------------------------------------------------------------------------|------------------------------|
| Wu et al. (2021) [189]     | Canada                                                               | 12 people with companion animals, including 8 with (dis)abilities | 92% female, 8% male<br>9 aged 40-59, 3 aged 18-39                        | Not reported                               | Qualitative interviews           | COVID-19 challenges (including those relating to animals); resources and support to address these challenges                | Suggestions for veterinary services and animal protection agencies; lessons learned for animal caregivers in future pandemics                                                     | December 2020 – May 2021     |
| Wu et al. (2023) [190]     | Canada                                                               | 12 people who cared for animals and sought veterinary treatment   | 92% female, 8% male<br>63% aged between 40-59, 27% aged between 18-39    | Not reported                               | Qualitative interviews           | -                                                                                                                           | Experiences obtaining veterinary care during the pandemic, including challenges, coping strategies, recommendations                                                               | December 2020 – May 2021     |
| Xin et al. (2021) [191]    | Authors in China; 99.6% of participants in China, 0.4% international | 756 people; a second survey was launched with 68 participants     | 27.6% male, 72.4% female<br>Age group most represented was 19-35 (61.6%) | Dogs, cats, rabbits, turtles, birds, other | Cross-sectional survey           | Insomnia; hypersomnia; anxiety; depression; fatigue; lack of enthusiasm; inattention; uncertainty; concerns about infection | Pet ownership – yes/no; type of pet; period of ownership; purpose of having pets; relationships with pets; attitudes toward pets; change in interaction with pets during pandemic | April 2020                   |
| Zablan et al. (2023) [192] | Australia                                                            | 177 older adult                                                   | 89.8% female                                                             | Dogs, cats, small mammals,                 | Cross-sectional semi-            | Experience of the pandemic                                                                                                  | Companion animal owner status; primary                                                                                                                                            | November 2020 – January 2021 |

|                                  |                              | companion<br>animal owners           | Mean age 70.72<br>(range 65 – 84)                                                                                                     | fish, birds,<br>horses,<br>livestock | structured<br>survey                                         |                                                                                                                                                                                                                                                                                             | animal carer<br>status; type(s) of<br>animals owned;<br>relationship with<br>pet during<br>pandemic and<br>how it changed<br>over time;<br>perceived impact<br>of how pets<br>influenced<br>wellbeing and<br>how pandemic<br>influenced pet<br>care |                                                                                         |
|----------------------------------|------------------------------|--------------------------------------|---------------------------------------------------------------------------------------------------------------------------------------|--------------------------------------|--------------------------------------------------------------|---------------------------------------------------------------------------------------------------------------------------------------------------------------------------------------------------------------------------------------------------------------------------------------------|-----------------------------------------------------------------------------------------------------------------------------------------------------------------------------------------------------------------------------------------------------|-----------------------------------------------------------------------------------------|
| Zainel et al.<br>(2023) [193]    | Qatar                        | 6,608 children<br>and<br>adolescents | 50.8% male,<br>49.2% female<br><br>62.8% aged<br>between 7-12,<br>37.2% aged<br>between 13-18                                         | Not reported                         | Cross-<br>sectional<br>survey with<br>open-ended<br>question | Open-ended<br>question about<br>what made<br>people happy<br>during lockdown                                                                                                                                                                                                                | -                                                                                                                                                                                                                                                   | June – July<br>2020                                                                     |
| Zaninotto et<br>al. (2022) [194] | United<br>Kingdom &<br>Italy | 96 individuals                       | Italy: 45% male<br>(mean age 40),<br>55% female<br>(mean age 41)<br><br>UK: 20% male<br>(mean age 43),<br>80% female<br>(mean age 23) | Dogs                                 | Longitudinal                                                 | Pandemic impact<br>as a traumatic<br>personal event;<br>mindfulness;<br>daily routines<br>and habits; short<br>version of SCL90-<br>R; depression,<br>anxiety and<br>stress; sleep<br>disorders; alcohol<br>and nicotine use;<br>cognitive tasks<br>assessing<br>attention and<br>vigilance | Dog walking –<br>yes/no                                                                                                                                                                                                                             | Data collected<br>once a week<br>for four weeks<br>'during first-<br>wave<br>lockdowns' |
